# Supplementary material
Source: PubMed Central journal article supplement (PMC8164521)
Supplement: NIHMS1700231-supplement-supporting.pdf [file NIHMS1700231-supplement-supporting.pdf]

## Supporting Information

Deciphering complex mechanisms of resistance and loss of potency through coupled molecular dynamics and machine learning.

**Authors:** Florian Leidner, Nese Kurt Yilmaz, Celia A. Schiffer\*

**Affiliation:**

Department of Biochemistry and Molecular Pharmacology, University of Massachusetts Medical School, Worcester, Massachusetts 01605, United States

\* Correspondence to: [Celia.Schiffer@umassmed.edu](mailto:Celia.Schiffer@umassmed.edu)

**Table S1.** Dataset information: HIV-1 protease variants with their experimental inhibition constants ( $K_i$ ) and PDB accession codes for available structures.

| Name             | $K_i$ (nM) | $\Delta G$ (kcal/mol) | Set   | Cluster | Reference | PDB ID |
|------------------|------------|-----------------------|-------|---------|-----------|--------|
| NL4-3 (WT)       | 0.005      | -15.5                 | Train | 2       | (1)       | 6dgx   |
| Var1-1Mut        | 0.026      | -14.5                 | Train | 2       | (1)       | 6dh0   |
| Var2-2Mut        | 0.23       | -13.2                 | Train | 2       | (2)       | 6opt   |
| Var3-2Mut        | 0.075      | -13.9                 | Train | 2       | (1)       | -      |
| Var4-5Mut        | 0.045      | -14.2                 | Train | 2       | (3)       | 4q1y   |
| Var5-4Mut        | 0.42       | -12.9                 | Train | 2       | (2)       | 6opu   |
| Var6-8Mut        | 12.8       | -10.8                 | Train | 3       | (2)       | 6opv   |
| Var7-10Mut       | 156.4      | -9.3                  | Train | 3       | (2)       | 6opy   |
| Var8-11Mut       | 759.2      | -8.4                  | Train | 3       | (2)       | 6opz   |
| Var9-9Mut        | 77.6       | -9.8                  | Train | 3       | (4)       | -      |
| Var10-7Mut       | 12.1       | -10.9                 | Train | 3       | (4)       | -      |
| Var11-10Mut      | 57.6       | -9.9                  | Train | 3       | (4)       | -      |
| Var12-6Mut       | 3.9        | -11.5                 | Train | 3       | (4)       | -      |
| Var13-10Mut      | 26.0       | -10.4                 | Train | 3       | (4)       | -      |
| Var14-12Mut      | 12.1       | -10.9                 | Train | 3       | (4)       | -      |
| Var15-12Mut      | 58.3       | -9.9                  | Train | 3       | (4)       | -      |
| Var16-10Mut      | 57.0       | -9.9                  | Train | 3       | (4)       | -      |
| Var17-14Mut      | 11.7       | -10.9                 | Train | 3       | (4)       | -      |
| Var18-20Mut      | 0.75       | -12.5                 | Test  | 1       | (5)       | 3ttp   |
| Var19-20Mut      | 15.0       | -10.7                 | Test  | 1       | (6)       | 3u7s   |
| Var20-7Mut       | 0.026      | -14.5                 | Test  | 2       | (7)       | 3ekt   |
| Var21-24Mut      | 6.95       | -11.2                 | Test  | 1       | (8)       | -      |
| Var22-4Mut (SF2) | 0.014      | -14.9                 | Test  | 2       | (9)       | 1t3r   |
| Var23-6Mut       | 6.6        | -11.2                 | Test  | 2       | (10)      | 2f80   |
| Var24-6Mut       | 17.0       | -10.7                 | Test  | 2       | (11)      | 3cyw   |
| Var25-20Mut      | 31.0       | -10.3                 | Test  | 1       | (12)      | 3ucb   |
| Var26-6Mut       | 0.51       | -12.8                 | Test  | 2       | (13)      | 5kqy   |
| Var27-6Mut       | 1.6        | -12.1                 | Test  | 2       | (11)      | 3d1z   |

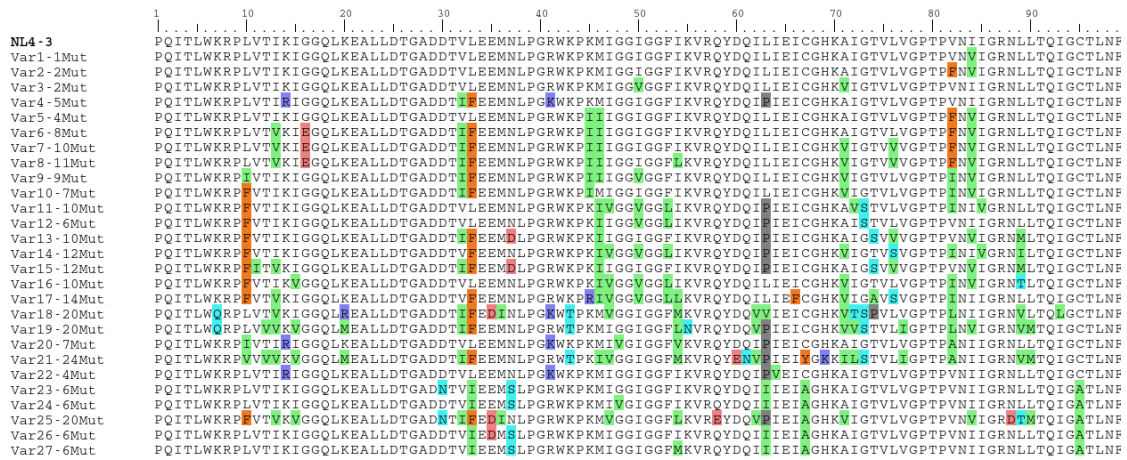

**Figure S1.** Amino acid sequence alignment of HIV-1 protease variants in the dataset. Mutations relative to the reference wild type (NL4-3) are colored according to residue type. (Green: Hydrophobic; Orange: Aromatic, Red: Negative Charge; Blue: Positive Charge; Cyan: Polar; Gray: Small)

## References

1. Lockbaum GJ, *et al.* (2018) Structural adaptation of darunavir analogues against primary mutations in HIV-1 protease. *ACS infectious diseases* 5(2):316-325.
2. Henes M, *et al.* (2019) Picomolar to Micromolar: Elucidating the Role of Distal Mutations in HIV-1 Protease in Conferring Drug Resistance. *ACS chemical biology* 14(11):2441-2452.
3. Ragland DA, *et al.* (2014) Drug resistance conferred by mutations outside the active site through alterations in the dynamic and structural ensemble of HIV-1 protease. *J. Am. Chem. Soc.* 136(34):11956–11963.
4. Spielvogel E, *et al.* (2019) Selection of HIV-1 for Resistance to Fourth Generation Protease Inhibitors Reveals Two Independent Pathways to High-Level Resistance. *bioRxiv*:837120.
5. Kožíšek M, *et al.* (2014) Thermodynamic and structural analysis of HIV protease resistance to darunavir—analysis of heavily mutated patient-derived HIV-1 proteases. *The FEBS journal* 281(7):1834-1847.
6. Šašková KG, *et al.* (2009) Molecular characterization of clinical isolates of human immunodeficiency virus resistant to the protease inhibitor darunavir. *Journal of virology* 83(17):8810-8818.
7. King NM, *et al.* (2012) Extreme entropy–enthalpy compensation in a drug-resistant variant of HIV-1 protease. *ACS chemical biology* 7(9):1536-1546.
8. Henes M, *et al.* (2019) Molecular determinants of epistasis in HIV-1 protease: Elucidating the interdependence of L89V and L90M mutations in resistance. *Biochemistry* 58(35):3711-3726.
9. Surleraux DL, *et al.* (2005) Discovery and selection of TMC114, a next generation HIV-1 protease inhibitor. *Journal of medicinal chemistry* 48(6):1813-1822.
10. Kovalevsky AY, *et al.* (2006) Effectiveness of nonpeptide clinical inhibitor TMC-114 on HIV-1 protease with highly drug resistant mutations D30N, I50V, and L90M. *Journal of medicinal chemistry* 49(4):1379-1387.
11. Liu F, *et al.* (2008) Effect of flap mutations on structure of HIV-1 protease and inhibition by saquinavir and darunavir. *Journal of molecular biology* 381(1):102-115.
12. Agniswamy J, *et al.* (2012) HIV-1 protease with 20 mutations exhibits extreme resistance to clinical inhibitors through coordinated structural rearrangements. *Biochemistry* 51(13):2819-2828.
13. Liu Z, *et al.* (2016) Effects of hinge-region natural polymorphisms on human immunodeficiency virus-type 1 protease structure, dynamics, and drug pressure evolution. *Journal of Biological Chemistry* 291(43):22741-22756.
